# Supplementary material
Source: Research Square preprint supplement (doi:10.21203/rs.3.rs-9774069/v1)
Supplement: Supplementary file 1 [file 4bc2b871e0821d574a49ed5e.xlsx]

## Sheet: Sheet1
Outcome Domain (COMET-aligned)	Standardisation	Subdomains	Measurement type	Raw_outcomes	Raw_count	Refined measurement classification
Adverse Events and Complications	Overdrainage Events	Device	Clinician-recorded, imaging	overdrainage events, subdural collections; sdh	3	Standardised quantitative measure
	Shunt malfunction	Device	Administrative / health record	csf leak; infection; csf microbiology; dislocation of catheter, malposition of catheter, obstruction of shunt, cerebrospinal fluid pseudocyst; shunt malfunction; shunt dysfunction; catheter tip position; catheter placement; kakarla; catheter migration; shunt placement	11	Standardised quantitative measure
	Underdrainage Events	Device	Clinician-recorded / health record	underdrainage events;	1	Unclear / narrative outcome
	Fall-related Injuries	Fall-related	Clinician-recorded / health record	fall related injuries ; fall risk improvement	2	Unclear / narrative outcome
	Peri-operative	Peri-operative	Clinician-recorded / health record	cardiovascular; delerium; ICSDSC; DVT; PE; liver failure; constipation; C-POMS; cardiac version of the postoperative morbidity survey;	9	Unclear / narrative outcome
	Surgical Complications	Surgical	Clinician-recorded / health record	adverse effects; complications; surgical complications; complication; complication rate; surgical site; wound infection; MRI- hypersignals;	3	Unclear / narrative outcome
Biological Markers	Coagulation markers	Blood	Laboratory assay	coagulation; clotting;	1	Standardised quantitative measure
	Red cell indices	Blood	Laboratory assay	mcv changes, mean cell volume;	1	Standardised quantitative measure
	Serum biochemistry	Blood	Laboratory assay	hydroxy dhea, serum or plasma homocysteine; 7œ±-hydroxy dhea; cortisol; cortisone; serum glucose levels; glucose	4	Standardised quantitative measure
	CSF AD-related Biomarkers	CSF	Laboratory assay	t tau; p tau; amyloid β 1–42, aβ42;	4	Standardised quantitative measure
	CSF APP Biomarkers	CSF	Laboratory assay	soluble app α ( sappα ), csf soluble app β ( sappβ ),csf amyloid β 1–38 ( aβ38 );	3	Standardised quantitative measure
	CSF Metalloproteinases	CSF	Laboratory assay	metalloproteinases; metalloproteinases{detail}; mmp 1/2/9/10; mmp-1/2/9/10; timp 1; timp-1	5	Standardised quantitative measure
	CSF Other	CSF	Laboratory assay	homocysteine; homovanillic acid (HVA); 5-hydroxyindoleacetic acid (5-HIAA); 3-methoxy-4-hydroxyphenylglycol (MHPG); neuropeptide Y (NPY); vasoactive intestinal peptide (VIP); γ-aminobutyric acid (GABA); sulfatide; ganglioside GD3; glial fibrillary acidic protein (GFAP); CSF - total protein; Man-Tf; GlcNAc-Tf; L-PGDS; Sia-Tf; CSF - albumin; 27-OH; 7HOCA; CSF - osmolality; CSF - electrophoresis; li…	10	Standardised quantitative measure
	CSF Temperature	CSF	Instrument-derived	CSF - temperature;	1	Standardised quantitative measure
	Genetic markers	Genetic	Genotyping	genotype	1	Standardised quantitative measure
Cognitive and Neuropsychological Function	2-choice Reaction	Attention / Processing Speed	Performance-based	2 choice reaction;	1	Standardised quantitative measure
	Attention/concentration Index	Attention / Processing Speed	Clinician-administered / performance-based	attention - concentration index;	1	Validated instrument
	Bourdon's Test	Attention / Processing Speed	Performance-based	bourdon; bourdon-wiersma	2	Validated instrument
	Dichotic Listening Task	Attention / Processing Speed	Clinician-administered / performance-based	dichotic listening task;	1	Validated instrument
	Digit Symbol Substitution Test	Attention / Processing Speed	Clinician-administered / performance-based	symbol substitution;	1	Validated instrument
	DSC	Attention / Processing Speed	Clinician-administered / performance-based	digit symbol coding;	1	Validated instrument
	Mefferd And Morgan Perceptual Speed Test	Attention / Processing Speed	Clinician-administered / performance-based	mefferd and morgan perceptual speed test;	1	Validated instrument
	MFTC	Attention / Processing Speed	Performance-based	mftc; frenchay test	1	Validated instrument
	Number Connection Test	Attention / Processing Speed	Clinician-administered / performance-based	number connection;	1	Validated instrument
	SDMT	Attention / Processing Speed	Clinician-administered / performance-based	sdmt; symbol digit memory test; symbol digit modalities test;	2	Validated instrument
	Serial Dotting Test	Attention / Processing Speed	Clinician-administered / performance-based	SDT; serial dotting test	1	Validated instrument
	Simple Reaction Time	Attention / Processing Speed	Clinician-administered / performance-based	simple reaction time;	1	Standardised quantitative measure
	Target Reaction Time	Attention / Processing Speed	Clinician-administered / performance-based	target reaction time;	1	Standardised quantitative measure
	Tracks Task	Attention / Processing Speed	Clinician-administered / performance-based	tracks task (motor speed);	1	Validated instrument
	NART	Baseline intellectual ability	Clinician-administered / performance-based	nart; national adult reading tests, national adult reading test iq;	1	Standardised quantitative measure
	Abstract Thinking	Executive Function	Clinician-administered / performance-based	abstract thinking;	1	Unclear / narrative outcome
	COWAT	Executive Function	Clinician-administered / performance-based	controlled oral word association test;	1	Validated instrument
	Frontal Assessment Battery	Executive Function	Clinician-administered / performance-based	frontal assessment battery (fab)	1	Validated instrument
	Luria's Rhythm Production	Executive Function	Clinician-administered / performance-based	hand sequencing test; luria's rhythm; rhythm production	3	Validated instrument
	Raven Progressive Matrices	Executive Function	Clinician-administered / performance-based	raven progressive matrices; colored matrices;	2	Validated instrument
	Reasoning Screening Test	Executive Function	Clinician-administered / performance-based	reasoning screening test;	1	Validated instrument
	Simple Verbal Analogies Test	Executive Function	Clinician-administered / performance-based	simple verbal analogies test;	2	Validated instrument
	Stroop Test	Executive Function	Clinician-administered / performance-based	stroop color-word test; stroop congruent and incongruent test; swedish stroop test;	3	Validated instrument
	TMT	Executive Function	Clinician-administered / performance-based	trail making test;	1	Validated instrument
	Verbal Fluency Task	Executive Function	Clinician-administered / performance-based	verbal fluency;	2	Validated instrument
	Word Fluency	Executive Function	Clinician-administered / performance-based	word fluency	1	Validated instrument
	ADAS	Global Cognition	Clinician-administered / performance-based	alzheimer disease assessment scale;	1	Validated instrument
	Addenbrooke's Cognitive Examination III	Global Cognition	Clinician-administered / performance-based	addenbrooke's cognitive examination iii;	1	Validated instrument
	Brief Mental Deterioriation Battery	Global Cognition	Clinician-administered / performance-based	brief mental deterioriation battery;	1	Validated instrument
	CERAD	Global Cognition	Clinician-administered / performance-based	consortium to establish a registry for alzheimer's disease;	1	Validated instrument
	Dementia Detection Test	Global Cognition	Clinician-administered / performance-based	dementia detection test; dementia scale 10 word test; clinical dementia rating;	3	Validated instrument
	Global Deterioration Scale	Global Cognition	Clinician-rated	global deterioration scale (gds); gds-15;	1	Validated instrument
	Hasegawa Dementia Scale	Global Cognition	Clinician-administered / performance-based	hasegawa dementia scale;	1	Validated instrument
	HDS-R	Global Cognition	Clinician-administered / performance-based	HDS-R	1	Validated instrument
	IQCODE	Global Cognition	Observer-reported (ObsRO)	informant questionnaire on cognitive decline in the elderly; informant's test;	2	Validated instrument
	Milan Overall Dementia Assessment	Global Cognition	Clinician-administered / performance-based	milan overall dementia assessment;	1	Validated instrument
	MMSE	Global Cognition	Clinician-administered / performance-based	mmse; thai mental; folstein, korean MMSE	4	Validated instrument
	Moca	Global Cognition	Clinician-administered / performance-based	montreal cognitive assessment; moca	1	Validated instrument
	Psychologist Evaluation	Global Cognition	Clinician-rated	psychologist; neuropsychology; neuropsychological assessment;	2	Unclear / narrative outcome
	Psychometric Performance	Global Cognition	Clinician-administered / performance-based	psychometric performance	1	Unclear / narrative outcome
	Rowland Universal Dementia Assessment Scale	Global Cognition	Clinician-administered / performance-based	rowland universal dementia assessment scale;	1	Validated instrument
	Benton Multilingual Aphasia Battery	Language	Clinician-administered / performance-based	benton multilingual aphasia battery;	2	Validated instrument
	Boston Diagnostic Aphasia Examination	Language	Clinician-administered / performance-based	boston diagnostic aphasia examination;	1	Validated instrument
	Boston Naming Test	Language	Clinician-administered / performance-based	boston naming test;	1	Validated instrument
	Benton Face Recognition	Memory	Clinician-administered / performance-based	benton face recognition;	1	Validated instrument
	Benton Visual Retention Test	Memory	Clinician-administered / performance-based	benton visual retention test;	1	Validated instrument
	Bingley Visual Memory Test	Memory	Clinician-administered / performance-based	bingley visual memory test;	1	Validated instrument
	Bingley's Memory Test	Memory	Clinician-administered / performance-based	bingley's memory test; memory and learning;	2	Validated instrument
	Bingley's Visual Recognition Test	Memory	Clinician-administered / performance-based	bingley's visual recognition test;	1	Validated instrument
	Buschke-fuld Selective Memory Test	Memory	Clinician-administered / performance-based	buschke fuld selective memory test;	1	Validated instrument
	California Verbal Learning Test	Memory	Clinician-administered / performance-based	california verbal learning test;	1	Validated instrument
	Corsi Block-tapping Test	Memory	Clinician-administered / performance-based	corsi block tapping test;	1	Validated instrument
	Cronholm-molander Test	Memory	Clinician-administered / performance-based	cronholm molander memory test;	1	Validated instrument
	Delayed Recall Of 10 Word List	Memory	Clinician-administered / performance-based	10 word memory test; delayed recall of 10-word list;	2	Validated instrument
	Delayed Recognition	Memory	Clinician-administered / performance-based	delayed recognition;	2	Validated instrument
	Digit Span	Memory	Clinician-administered / performance-based	digit span test	1	Validated instrument
	Enhanced cued recall	Memory	Clinician-administered / performance-based	ERCT;	1	Validated instrument
	Guild Paragraph Recall Test	Memory	Clinician-administered / performance-based	guild paragraph recall test;	1	Validated instrument
	Hopkins Verbal Learning Task-revised	Memory	Clinician-administered / performance-based	hopkins verbal learning;	1	Validated instrument
	Identical Forms Test	Memory	Clinician-administered / performance-based	identical forms test;	1	Validated instrument
	Immediate Visual Memory	Memory	Clinician-administered / performance-based	immediate visual memory;	1	Structured non-validated measure
	Kendrick Object Learning Test	Memory	Clinician-administered / performance-based	kendrick object; object learning	2	Validated instrument
	Luria IO-words-list	Memory	Clinician-administered / performance-based	IO-words;	1	Validated instrument
	Memory Impairment	Memory	Clinician-rated	memory impairment outcome;	1	Validated instrument
	Oktem Verbal Learning Processes Test	Memory	Clinician-administered / performance-based	oktem verbal learning processes test;	1	Validated instrument
	RAVLT	Memory	Clinician-administered / performance-based	ravlt; rey auditory verbal learning test;	1	Validated instrument
	Rivermead Behavioural Memory Test	Memory	Clinician-administered / performance-based	rivermead behavioral memory test;	1	Validated instrument
	WMS	Memory	Clinician-administered / performance-based	attention/concentration of the wechsler memory scale revised (wms r); wechsler memory scale; wms r mental control; wms r visual reproduction 1 and 2;	4	Validated instrument
	CANTAB	Neuropsychological assessment	Clinician-administered / performance-based	cambridge neuropsychological test automated battery;	1	Validated instrument
	NAB	Neuropsychological assessment	Clinician-administered / performance-based	Neuropsychological Assessment Battery; NAB	1	Validated instrument
	RBANS	Neuropsychological assessment	Clinician-administered / performance-based	rbans; repeatable battery for the assessment of neuropsychological status;	1	Validated instrument
	Seoul Neuropsychological Screening Battery	Neuropsychological assessment	Clinician-administered / performance-based	seoul neuropsychological screening battery;	1	Validated instrument
	WAIS	Neuropsychological assessment	Clinician-administered / performance-based	cognitive estimation test (wais r); digit symbol substitution test (dsst); wais iii block design, wais iii digit symbol coding; wais summary score; wais-iii block design; wechsler adult intelligence scale	5	Validated instrument
	Benton Temporal Orientation Test	Orientation	Performance-based	benton temporal orientation test;	1	Validated instrument
	Galveston Orientation And Amnesia Test	Orientation	Clinician-administered / performance-based	galveston orientation and amnesia test;	1	Validated instrument
	Benton 3D Block Construction	Visuospatial Function	Clinician-administered / performance-based	3-dimensional block construction; benton 3d block construction;	2	Standardised quantitative measure
	Clock Drawing Test	Visuospatial Function	Clinician-administered / performance-based	clock drawing test;	1	Validated instrument
	Copy Design	Visuospatial Function	Clinician-administered / performance-based	copy design;	1	Structured non-validated measure
	Cube	Visuospatial Function	Clinician-administered / performance-based	cube	1	Structured non-validated measure
	Rey-osterrieth Complex Figure Drawing Test	Visuospatial Function	Clinician-administered / performance-based	recall of a complex figure; rey-osterrieth complex figure drawing test;	2	Validated instrument
	Visuospatial Construction	Visuospatial Function	Clinician-administered / performance-based	visuospatial construction;	1	Structured non-validated measure
Emotional Functioning / Wellbeing	Apathy Evaluation Scale	Affect and motivation	Patient-reported (PRO)	apathy evaluation scale;	1	Validated instrument
	IW/AE/EM	Affect and motivation	Clinician-administered / performance-based	asteno-emotional disorder; emotional motivational disorder as per lindquist and co workers; impairment of wakeness;	3	Validated instrument
	State Apathy Evaluation Scale	Affect and motivation	Patient-reported (PRO)	state apathy evaluation scale (self rated aes s);	1	Validated instrument
	BDI	Depressive symptoms	Patient-reported (PRO)	beck depression inventory (bdi); beck depression inventory second edition;	2	Validated instrument
	Geriatric Depression Scale	Depressive symptoms	Patient-reported (PRO)	symptoms of depression (geriatric depression scale 15),	1	Validated instrument
	Frontal Behavioural Inventory	Frontal behavioural dysfunction	Observer-reported (ObsRO)	fbi; frontal behavioural inventory;	1	Validated instrument
	Frontal Systems Behaviour Scale	Frontal behavioural dysfunction	Mixed (PRO / ObsRO)	frontal systems behavior scale;	1	Validated instrument
	Lindqvist-Malmgren	Neuropsychiatric symptoms	Clinician-rated	lindqvist; malmgren	2	Validated instrument
	NPI-Q	Neuropsychiatric symptoms	Observer-reported (ObsRO)	neuropsychiatric inventory; npiq	2	Validated instrument
Functional Status / Independence	Assessment of Motor and Process Skills	ADLs	Performance-based	Assessment of Motor and Process Skills; AMPS	1	Validated instrument
	Barthel Index	ADLs	Clinician-rated	barthel index; barthel scale, barthel grading,	1	Validated instrument
	Carer / Family Reported Functional Status	ADLs	Observer-reported (ObsRO)	carer reported; family reported;	2	Structured non-validated measure
	Daily Life Activities Scale	ADLs	Patient-reported (PRO)	daily life activities scale	1	Structured non-validated measure
	Everyday Activities Scale	ADLs	Clinician-rated	everyday activities;	1	Structured non-validated measure
	Functional Activities Questionnaire	ADLs	Patient-reported (PRO)	functional activities questionnaire faq;	1	Validated instrument
	Functional Independence Measure	ADLs	Clinician-rated	functional independence measure;	1	Validated instrument
	Katz Index Of Daily Living Activites	ADLs	Mixed (PRO / ObsRO)	katz; katz index of daily living activites;	1	Validated instrument
	Lawton ADLs	ADLs	Clinician-rated	lawton; activities of daily living/independent activities of daily living questionnaire;	2	Validated instrument
	LTCB	Disability	Patient-reported (PRO)	ltcb disability/dementia;	1	Validated instrument
	RDRS-2	Disability	Observer-reported (ObsRO)	rapid disability; rating scale 2 in alzheimer's disease; rapid disability rating scale-2 in alzheimer's disease;	1	Validated instrument
	Karnofsky Performance Status	Global functional performance	Clinician-rated	karnofsky	1	Validated instrument
	mRS	Global functional performance	Clinician-rated	modified rankin scale	1	Validated instrument
Healthcare Utilisation and Economic Impact	Right First Time (RFT)	Care process efficiency	System performance	right first time; RFT;	1	Standardised quantitative measure
	Direct Healthcare costs	Costs	Clinician-recorded	admission cost; costs	2	Standardised quantitative measure
	Shunt Adjustments	Device management	Clinician-recorded	number of valve adjustmenets; valve adjustment;	2	Standardised quantitative measure
	Non-routine Discharge	Discharge outcomes	Administrative / health record	non routine discharge;	1	Standardised quantitative measure
	Endoscopic Efficacy	Procedural success	Clinician-recorded	endoscopic efficacy;	1	Structured non-validated measure
	ETV Success/failure	Procedural success	Clinician-recorded	etv failure; etv success	2	Standardised quantitative measure
	Return To Theatre	Re-intervention	Clinician-recorded	return to theatre; ; RTT	1	Standardised quantitative measure
	Revision Rate	Re-intervention	Administrative / health record	revision rate; number of revisions, repeat shunt surgery;	2	Standardised quantitative measure
	Time To First Revision	Re-intervention	Administrative / health record	time to first revision;	1	Standardised quantitative measure
	ICU Admission	Resource utilisation	Administrative / health record	icu admission;	2	Standardised quantitative measure
	Length Of Stay	Resource utilisation	Administrative / health record	duration of hospital stay; postoperative length of stay;	2	Standardised quantitative measure
	Operative time	Resource utilisation	Administrative / health record	operative time	1	Standardised quantitative measure
	Readmission	Resource utilisation	Administrative / health record	readmission within 180 days; readmission within 30 days; any readmission	3	Standardised quantitative measure
	Return To ED Within 30 Days	Resource utilisation	Administrative / health record	return to emergency department within 30 days; return to emergency department	2	Standardised quantitative measure
	Time to Follow-up	Resource utilisation	Administrative / health record	follow up time;	1	Standardised quantitative measure
	Patient Satisfaction	Service quality	Patient-reported (PRO)	patient experience; patient satisfaction	2	Structured non-validated measure
Mobility, Gait and Balance	Berg Balance Scale	Balance	Clinician-administered / performance-based	berg balance scale;	1	Validated instrument
	Ordinal Balance Score	Balance	Clinician-administered / performance-based	ordinal balance score;	1	Validated instrument
	Dynamic balance	Balance	Performance-based	truncal sway; triaxial accelerometer	2	Validated instrument
	Functional Reach Test	Balance	Performance-based	functional reach test;	1	Validated instrument
	Mini-bestest	Balance	Performance-based	mini balance evaluation systems test (mini bestest);	1	Validated instrument
	Other balance test	Balance	Clinician-administered / performance-based	balance other;	1	Unclear / narrative outcome
	Posturo-Locomotion Manual	Balance	Clinician-administered / performance-based	posturo-locomotion	1	Validated instrument
	Posturography	Balance	Device-derived	posturography; force platform centre; postural sway; postural stability	4	Standardised quantitative measure
	Romberg's Test	Balance	Clinician-administered / performance-based	romberg's test;	3	Structured non-validated measure
	Static Standing Balance	Balance	Performance-based	base of support; standing base; standing balance; static standing;	4	Structured non-validated measure
	Falls Frequency	Falls	Clinician-recorded / Patient-reported (PRO)	falls frequency; falls incidence;	2	Standardised quantitative measure
	FES-I	Falls	Patient-reported (PRO)	confidence in avoiding falls (swedish falls efficacy scale (fes(s)); falls efficacy scale international; ; FOF; fear of falling; short fes i survey,	2	Validated instrument
	30sCST	Functional mobility	Performance-based	30-second; 30s chair stand	1	Validated instrument
	5xSTS	Functional mobility	Performance-based	five times; sit to stand;	2	Validated instrument
	6 Flights Stair Time	Functional mobility	Performance-based	6 flights; stair	1	Structured non-validated measure
	Actigraphy	Functional mobility	Device-derived	actigraphy; metabolic equivalent of task; steps voluntary walking time;	3	Standardised quantitative measure
	Functional Ambulation Performance	Functional mobility	Clinician-administered / performance-based	functional ambulation; ambulation performance	2	Standardised quantitative measure
	Hauser Ambulatory Index	Functional mobility	Clinician-administered / performance-based	ambulatory index; hauser ;	2	Validated instrument
	Morton Mobility Index	Functional mobility	Performance-based	mmi; morton mobility index;	1	Validated instrument
	Remote Activity Monitoring	Functional mobility	Device-derived	remote activity monitoring; (percentage of day spent active, percentage of day with a static posture, percentage of day with an active posture, total daily steps, daily cadence); remoteactivitymonitoring(percentageofdayspentactive,percentageofdaywithastaticposture,percentageofdaywithanactiveposture,totaldailysteps,dailycadence)	5	Standardised quantitative measure
	Time to Sit Up	Functional mobility	Performance-based	time to sit up;	1	Standardised quantitative measure
	Tug	Functional mobility	Performance-based	timed up and go test, tug	1	Validated instrument
	Walking Aid Need	Functional mobility	Clinician-recorded	walking aid need; gait assistive devices	2	Structured non-validated measure
	10MWT	Gait	Performance-based	10m walk (steps and seconds measured); 10mwt (steps); 10mwt (seconds); walking time;	2	Validated instrument
	20MWT	Gait	Performance-based	20m;	1	Structured non-validated measure
	3MWT	Gait	Performance-based	3MWT	2	Structured non-validated measure
	50MWT	Gait	Performance-based	50M; WT-50M-steps	2	Structured non-validated measure
	5MWT	Gait	Performance-based	5MWT	1	Structured non-validated measure
	6MWT	Gait	Performance-based	6m;	1	Validated instrument
	BW3M	Gait	Performance-based	walk backwards;	1	Structured non-validated measure
	Dutch Gait Scale	Gait	Clinician-administered / performance-based	dutch gait scale;	1	Validated instrument
	Dynamic Gait Index	Gait	Clinician-administered / performance-based	functional gait analysis, dynamic gait	2	Validated instrument
	Gait Analysis	Gait	Performance-based / device	180 turn steps; distance between feet when walking; cadence, stride length, gait stability ratio, percentage of gait cycle spent in initiation and double support, step length; gait analysis; gait assessment; gait parameters; turn step; gait characteristics; assessment - gait	9	Standardised quantitative measure
	Gait Apraxia Scale	Gait	Clinician-administered / performance-based	gait apraxia;	1	Structured non-validated measure
	GSS / GSSR	Gait	Clinician-administered / performance-based	gait status scale;	1	Validated instrument
	Instrumented Gait	Gait	Device-derived	video - gait; infotronic ultraflex; gait video	3	Standardised quantitative measure
	Tinetti Test	Gait	Performance-based	tinetti (total gait and balance scale); tinetti test performance orientated mobility assessment (poma);	2	Validated instrument
	Tremor Analysis	Gait	Performance-based / device	tremor analysis;	1	Standardised quantitative measure
	Triaxial Accelerometer Ambulatory Centre Of Mass Movement	Gait	Device-derived	triaxial accelerometer ambulatory centre of mass movement;	1	Standardised quantitative measure
Motor	4 Finger Tapping	Fine motor performance	Performance-based	4 finger tapping (amplitude and velocity);	2	Structured non-validated measure
	Box and Block Test	Fine motor performance	Performance-based	bab; box and block;	1	Validated instrument
	Grooved Pegboard Test	Fine motor performance	Performance-based	grooved pegboard test, gpt	1	Validated instrument
	Line Tracing Test	Fine motor performance	Performance-based	line-tracing test; LTT	1	Validated instrument
	Purdue Pegboard Test	Fine motor performance	Performance-based	purdue pegboard test;	1	Validated instrument
	Serial Dotting Test	Fine motor performance	Performance-based	serial dotting	1	Validated instrument
	Timed writing	Fine motor performance	Performance-based	timed writing; timed copying; alphabet; pentagons	4	Structured non-validated measure
	Hoehn And Yahr Scale	Global motor severity	Clinician-rated	hoehn; yahr ; hoehn and yahr scale	1	Validated instrument
	Movement Trajectory Amplitude	Motor co-ordination	Performance-based	movement trajectory amplitude;	1	Standardised quantitative measure
	Rapid Alternating Hand Movement	Motor co-ordination	Performance-based	rapid alternating	1	Structured non-validated measure
	Volitional Motor Tasks	Motor co-ordination	Performance-based	volitional motor; ballistic	2	Unclear / narrative outcome
	Electromechanical Delay	Motor timing	Instrument-derived	electromechanical delay;	1	Standardised quantitative measure
	Muscle Tone	Muscle strength and tone	Clinician-rated	muscle tone;	1	Structured non-validated measure
	Quadriceps Strength	Muscle strength and tone	Performance-based / Instrument-derived	quadriceps strength	1	Standardised quantitative measure
Multidomain grade	GCS	Consciousness	Clinician-rated	gcs, glasgow coma scale;	1	Validated instrument
	CIBIC	Functional Outcome	Clinician-rated	cibic; clinicians interview based impression of change;	1	Validated instrument
	Glasgow Outcome Scale	Functional Outcome	Clinician-rated	glasgow outcome scale; gos	1	Validated instrument
	Global Deterioration Scale	Global disease severity	Clinician-rated	global deterioration scale (gds), gds 15;	1	Validated instrument
	NIHSS	Global disease severity	Clinician-rated	national institutes of health strokes scale; nihss	1	Validated instrument
	UPDRS	Global disease severity	Clinician-rated	updrs; unified parkinson's disease rating scale;	1	Validated instrument
	Boon Scale	iNPH symptom severity	Clinician-rated	european; boon scale	1	Structured non-validated measure
	Homburg-Hydrocephalus Scale	iNPH symptom severity	Clinician-rated	homburg hydrocephalus scale; hhs	1	Structured non-validated measure
	iNPH Grading Scale	iNPH symptom severity	Clinician-rated	inph grading scale; kubo, hellström inph scale;	3	Validated instrument
	Japanese NPH Grading Scale	iNPH symptom severity	Clinician-rated	jcsrih; jmwh;	2	Validated instrument
	Kiefer Grading Scale	iNPH symptom severity	Clinician-rated	homburg scale; keifer scale for inph; keifer's hydrocephalus score	3	Structured non-validated measure
	Krauss Improvement Index	iNPH symptom severity	Clinician-rated	krauss improvement index; krauss index;	1	Structured non-validated measure
	Krauss Scale	iNPH symptom severity	Clinician-rated	krauss scale;	1	Structured non-validated measure
	Larsson Categorisation Score	iNPH symptom severity	Clinician-rated	larsson;	1	Structured non-validated measure
	NPH Recovery Rate	iNPH symptom severity	Clinician-rated	recovery rate; recovery index (ri);	2	Structured non-validated measure
	Global clinical response	iNPH symptom severity	Clinician-rated	other clinician;	1	Unclear / narrative outcome
	Stein-Langfitt Score	iNPH symptom severity	Clinician-rated	stein and langfitt (gait and mental symptoms);	1	Validated instrument
	Steudel Grading Scale	iNPH symptom severity	Clinician-rated	steudel grading scale;	1	Validated instrument
	Co-morbidity Index	Overall health burden	Clinician-rated	co-morbidity-index; cmi	1	Structured non-validated measure
Neuroimaging	Cerebral Perfusion	Cerebral haemodynamics and perfusion	Imaging	brain spect hmpao; cerebral metabolic rate of glucose (rcmrglc)., fp cit spect, tc trodat 1; cerebral perfusion; cerebrovascular reactivity capacity (cvr); perfusion patterns of cortex; pet cbf; spect rcbf; rCBV	10	Standardised quantitative measure
	Venogram	Cerebral haemodynamics and perfusion	Imaging	CTV; MRV; venogram	3	Standardised quantitative measure
	Diffusion Tensor Imaging	Connectivity	Imaging	apparent diffusion coefficient (adc); diffusion tensor imaging; fractional anisotropy; dMRI; rmsd	5	Standardised quantitative measure
	Functional MRI	Connectivity	Imaging	MRI - functional connectivity; fmri;	2	Standardised quantitative measure
	CSF Flow and Clearance Dynamics	CSF dynamics	Imaging	aqueduct stroke volume; MR flow void; csf flow dynamics (imaging based); transependymal csf resorption (imaging findings); ventricular reflux; CSF - velocity; MRI - cine; isotope cisternography; pump clearance	9	Standardised quantitative measure
	Composite Scales	Global imaging severity	Clinician-rated	inph radscale; nph score; bech score, silver score	4	Unclear / narrative outcome
	MR Spectroscopy	Metabolism and molecular imaging	Imaging	spectroscopy; 1h-mr spectroscopy; metabolite ratios (naa, choline, myo inositol, glutamate, lactate)	8	Standardised quantitative measure
	PET	Metabolism and molecular imaging	Imaging	pet scan;	1	Standardised quantitative measure
	Cerebral microbleed	Parenchymal integrity and small-vessel disease	Imaging	microbleed; CMB	1	Standardised quantitative measure
	White Matter & Structural Lesions	Parenchymal integrity and small-vessel disease	Imaging	deep white matter hyperintensity (dwmh); fazekas scale; flow void sign; lacunar infarctions; periventricular hyperintensities (pvh); white matter changes, wahlund, cvsd;	8	Standardised quantitative measure
	Regional brain morphology	Structural anatomy	Imaging	volumes: putamen, pituitary; midbrain; corpus callosum	4	Standardised quantitative measure
	Subarachnoid & Anatomical Space	Structural anatomy	Imaging	ap diameter of subarachnoid space; ; desh; atrophy of sulci index; midbrain diameters; schelten's medial temporal atrophy scores; subarachnoid & anatomical space; sylvia fissure volume; enlarged sulci; cistern space; aos index	10	Standardised quantitative measure
	Ventricular Morphology	Structural anatomy	Imaging	3rd ventricle index; callosal angle; cella media index; evans index; ventricular morphology; ventricular score; ventricular volume; width of third and lateral ventricles, frontal horn inter distance, lateral ventricle size; bicaudate index; 3rd ventricle size; frontal horn index	13	Standardised quantitative measure
	Volumetrics	Structural anatomy	Imaging	global volume; atrophy; cortex thickness; MRI - volume;	4	Standardised quantitative measure
	Catheter & Shunt Imaging	Treatment-related imaging	Imaging	catheter & shunt imaging; ct/mri documentation of catheter tip location; shuntography (obstruction/disconnection);	3	Unclear / narrative outcome
Patient Reported Symptoms and Experience	Goal Attainment Scaling	Global perceived benefit	Patient-reported (PRO)	gas; goal attainment scaling;	1	Validated instrument
	Global Rating of Change Scale	Global perceived benefit	Patient-reported (PRO)	global rating of change scale; grcs	1	Validated instrument
	Cosmesis	Lived experience and participation	Clinician-rated	cosmetic;	1	Unclear / narrative outcome
	Life Space Assessment Questionnaire	Lived experience and participation	Patient-reported (PRO)	life space assessment questionnaire;	1	Validated instrument
	Lindqvist Impairment Of Wakefulness	Sleep and wakefulness	Patient-reported (PRO)	lindqvist impairment of wakefulness,	1	Structured non-validated measure
	Need For Sleep	Sleep and wakefulness	Patient-reported (PRO)	need for sleep;	1	Structured non-validated measure
	Sleep Time	Sleep and wakefulness	Performance-based / Device	sleep time;	2	Standardised quantitative measure
	Patient Reported - cognitive	Symptom burden	Patient-reported (PRO) / Clinician-rated	Patient Reported - cognitive; Clinical Symptoms - cognitive; Interview - cognitive; clinical symptoms - dementia;	4	Structured non-validated measure
	Patient Reported - gait	Symptom burden	Patient-reported (PRO) / Clinician-rated	Patient Reported - gait; Clinical Symptoms - gait; Interview - gait;	3	Structured non-validated measure
	Patient Reported - urinary	Symptom burden	Patient-reported (PRO) / Clinician-rated	Patient Reported - urinary, Clinical Symptoms - urinary; Interview - Urinary	3	Structured non-validated measure
	Self-reported Symptoms / Patient Reported	Symptom burden	Patient-reported (PRO)	self reported symptoms; clinical symptoms - improvement	2	Structured non-validated measure
Physiological Markers	Articulation Test	Bulbar motor and speech	Clinician-administered / performance-based	articulation test;	1	Structured non-validated measure
	Bulbar Dysfunction	Bulbar motor and speech	Clinician-rated	bulbar dysfunction;	1	Unclear / narrative outcome
	Swallowing Problem Questionnaire	Bulbar motor and speech	Patient-reported (PRO)	swallowing problem questionnaire;	1	Unclear / narrative outcome
	Thai Nasality Test / Nasometer	Bulbar motor and speech	Performance-based	nasality; nasometer	2	Standardised quantitative measure
	Volume And Frequency Of Voice	Bulbar motor and speech	Performance-based	volume and frequency of voice;	2	Standardised quantitative measure
	ICP Monitoring	CSF	Instrument-derived	intracranial pressure (ICP); icp gradient; icp monitoring; postural icp changes; CSF - pulse amplitude; CSF - elasticity;	6	Standardised quantitative measure
	CSF Flow Dynamics	CSF	Instrument-derived	csf dynamics; csf flow (gop); csf outflow resistance; csf outflow conductance, csf flow rate;	5	Standardised quantitative measure
	LP Log Scores	CSF	Instrument-derived	lp log scores;	1	Structured non-validated measure
	EEG	Electrophysiology	Instrument-derived	EEG analysis (gamma csd); EEG eloreta npv; ; EEG	3	Standardised quantitative measure
	EMG	Electrophysiology	Instrument-derived	central motor conduction time; motor evoked potentials (MEPs); EMG; resting motor threshold (rmt), m wave area ratio, intracortical facilitation, short intracortical inhibition (sici); total motor conduction time;	8	Standardised quantitative measure
	TMS	Electrophysiology	Instrument-derived	TMS	1	Standardised quantitative measure
	Otoacoustic Emission Phase Shifts In Response To Body Tilts	Posture and vestibular function	Clinician-recorded	otoacoustic emission phase shifts in response to body tilt	1	Standardised quantitative measure
	Subjective Visual Vertical In Pitch	Posture and vestibular function	Performance-based	subjective visual vertical in pitch;	2	Standardised quantitative measure
	Ocular biomarkers	Sensory systems	Instrument-derived	average intraocular pressure iop; average cct, average disc rnfl, average rim area, average hcdr, average vcdr, average cup disc area ratio), instrumental glaucoma assessment (macular rnfl, gcl, md, psd);	11	Standardised quantitative measure
	Pure Tone Audiometry	Sensory systems	Performance-based	pure tone audiometry (bone conduction);	1	Standardised quantitative measure
	Sensory vibration	Sensory systems	Clinician-administered	vibration assessment	1	Structured non-validated measure
	Sniffing Sticks TDI Score	Sensory systems	Performance-based	sniffing sticks TDI score;	1	Validated instrument
	Visual sensory function	Sensory systems	Clinician-recorded	ophthalmology; visual discrimination	2	Unclear / narrative outcome
	Sleep Actigraphy	Sleep and systemic performance	Performance-based / Device	sleep actigraphy;	1	Standardised quantitative measure
	Sleep Polysomnography	Sleep and systemic performance	Performance-based / Device	polysomnography;	1	Standardised quantitative measure
	Total Energy Cost	Sleep and systemic performance	Performance-based / Device	total energy cost (basal metabolic rate, the energy cost of digestion, and the energy cost of physical activity);	3	Standardised quantitative measure
Quality of Life	NQL-D/NQL-ED	Disease-specific quality of life	Patient-reported (PRO)	neurology QOL; nql-d;	1	Validated instrument
	Qol Alzheimer's Disease Scale	Disease-specific quality of life	Patient-reported (PRO)	QOL alzheimer's disease scale;	2	Validated instrument
	Black Grading Scale	Global quality of life	Clinician-rated	black grading scale; black rating scale for shunt assessment;	1	Structured non-validated measure
	15dqol	Health related QoL	Patient-reported (PRO)	15 dimensions quality of life scale;	1	Validated instrument
	Aqol-gd	Health related QoL	Patient-reported (PRO)	aqol-gd;	3	Validated instrument
	EQ-5D-5L	Health related QoL	Patient-reported (PRO)	eq-vas; euroqol 5 dimension 5 level instrument;	2	Validated instrument
	Qol SF-12 / 36	Health related QoL	Patient-reported (PRO)	QOL SF-12; 12 item short form health survey; QOL SF-36	3	Validated instrument
	Qol Other	Health utility	Patient-reported (PRO)	qol other; QALY	2	Unclear / narrative outcome
Societal and Carer Impact	Caregiver Burden Scale (Elmståhl)	Caregiver burden	Patient-reported (PRO)	caregiver burden scale (elmståhl);	1	Validated instrument
	Zarit Caregiver Burden Interview	Caregiver burden	Patient-reported (PRO)	zarit caregiver burden interview;	1	Validated instrument
	IPA	Social participation	Patient-reported (PRO)	impact on participation and autonomy (ipa) questionnaire;	1	Validated instrument
	Social Functioning	Social participation	Patient-reported (PRO)	social functioning;	1	Structured non-validated measure
Survival / Mortality	Mortality	Survival / Mortality	Administrative / health record	death, mortality rate; mortality (dates and causes);	4	Standardised quantitative measure
	Survival Rate	Survival / Mortality	Administrative / health record	survival rate;	1	Standardised quantitative measure
Urinary function	Post-void Residual (PVR)	Bladder emptying and flow	Clinician-recorded	post void residual; post-void residual; residual urine volume after voiding; PVR	1	Standardised quantitative measure
	Urine Average Flow Rate	Bladder emptying and flow	Clinician-recorded	mean urine flow rate.; urine average flow rate	1	Standardised quantitative measure
	Urine Maximum Flow Rate	Bladder emptying and flow	Clinician-recorded	peak flow rate; urine maximum flow rate;	1	Standardised quantitative measure
	Urine Voided Volume	Bladder emptying and flow	Patient-reported (PRO)	subjective diary or report of voided volumes; urine voided volume;	2	Standardised quantitative measure
	Renal Spectroscopy	Renal assessment	Imaging	renal changes/metabolites via imaging.; renal spectroscopy;	2	Standardised quantitative measure
	FAIT Scale	Urinary symptom burden	Patient-reported (PRO)	functional assessment of incontinence therapy (fait scale);	1	Validated instrument
	ICIQ Suite	Urinary symptom burden	Patient-reported (PRO)	international consultation on incontinence questionnaire (iciq); iciq ui sf	2	Validated instrument
	IPSS	Urinary symptom burden	Patient-reported (PRO)	international prostate symptom score	1	Validated instrument
	LUTS Questionnaire	Urinary symptom burden	Patient-reported (PRO)	luts; lower urinary tract symptoms; luts questionnaire; urinary urgency; urinary frequency; voiding difficulty	4	Structured non-validated measure
	OAB Suite	Urinary symptom burden	Patient-reported (PRO)	oab suite; overactive bladder questionnaire; overactive bladder questionnaire short form (oab-q sf); overactive bladder symptom score (oabss);	3	Validated instrument
	Sandvik’s Severity Index	Urinary symptom burden	Patient-reported (PRO)	sandvik's severity index for urinary incontinence;	3	Validated instrument
	Urge incontinence scale	Urinary symptom burden	Patient-reported (PRO)	urge incontinence scale; urge incontinence	2	Structured non-validated measure
	Urinary Incontinence Scale	Urinary symptom burden	Clinician-recorded, Observer-reported (ObsRO)	subjective incontinence outcome; urinary incontinence scale; standardized rank based urinary scoring	3	Structured non-validated measure
	Detrusor Pressure	Urodynamics	Clinician-recorded	detrusor pressure (max); maximum detrusor pressure during voiding; pressure at maximum flow (qmax​);	3	Standardised quantitative measure
	Intraperitoneal Pressure (IPP)	Urodynamics	Clinician-recorded	intraperitoneal pressure (ipp); ipp monitoring;	2	Standardised quantitative measure
	Maximum Cystometric Capacity	Urodynamics	Clinician-recorded	maximum cystometric capacity; total functional bladder capacity;	2	Standardised quantitative measure
	Urodynamic Studies	Urodynamics	Clinician-recorded	bladder compliance; filling cystometry; first/strong desire to void; pressure-flow studies (pfs); urodynamic parameters; urodynamic studies;	6	Standardised quantitative measure
					567
