# Supplementary material
Source: Research Square preprint supplement (doi:10.21203/rs.3.rs-9774069/v1)
Supplement: Supplementary file 2 [file a0a31da7a8139963e9a73cb0.xlsx]

## Sheet: Sheet1
	1	Hydrocephalus, Normal Pressure/
	2	normal pressure hydrocephalus.ab,kw,ti,tw.
		idiopathic normal pressure hydrocephalus.ab,kw,ti,tw.
	3	normotensive hydrocephalus.ab,kw,ti,tw.
	4	normopressive hydrocephalus.ab,kw,ti,tw.
	5	chronic hydrocephalus.ab,kw,ti,tw.
	6	adult hydrocephalus.ab,kw,ti,tw.
	7	communicating hydrocephalus.ab,kw,ti,tw.
	8	non-obstruct* hydrocephalus.ab,kw,ti,tw.
	9	hakim* syndrome*.ab,kw,ti,tw.
	10	hakim-adams triad.ab,kw,ti,tw.
	11	nph.ab,kw,ti,tw.
	12	nphs.ab,kw,ti,tw.
	13	inph.ab,kw,ti,tw.
	14	inphs.ab,kw,ti,tw.
	15	1 or 2 or 3 or 4 or 5 or 6
	16	exp Cerebrospinal Fluid Shunts/	Includes (VPS shunt and ventriculostomy)
	17	cerebrospinal fluid shunt*.ab,kw,ti,tw.
		cerebrospinal shunt*.ab,kw,ti,tw.
		csf shunt*.ab,kw,ti,tw.
		shunt*.ab,kw,ti,tw.
	18	endoscopic third ventriculostom*.ab,kw,ti,tw.
		ventriculostom*.ab,kw,ti,tw.
		ventriculocisternostom*.ab,kw,ti,tw.
		ventricular cisternostom*.ab,kw,ti,tw.
		cisternostom*.ab,kw,ti,tw.
	24	ETV.ab,kw,ti,tw.
	19	ventriculo-peritoneal shunt*.ab,kw,ti,tw.
	20	ventriculoperitoneal shunt*.ab,kw,ti,tw.
		ventriculo peritoneal shunt*.ab,kw,ti,tw.
		brain ventricle peritoneum shunt*.ab,kw,ti,tw.
		peritoneal subdural shunt.ab,kw,ti,tw.
		subdural peritoneal shunt.ab,kw,ti,tw.
	21	Lumboperitoneal shunt*.ab,kw,ti,tw.
	22	Lumbo-peritoneal shunt*.ab,kw,ti,tw.
		ventriculoatrial shunt*.ab,kw,ti,tw.
		ventriculopleural shunt*.ab,kw,ti,tw.
	23	VPS.ab,kw,ti,tw.
		vlps.ab,kw,ti,tw.
		Va.ab,kw,ti,tw.
	25	LPS.ab,kw,ti,tw.
		surger*.ab,kw,ti,tw.
		surgical procedure.ab,kw,ti,tw.
		surgical treatment.ab,kw,ti,tw.
	26	8 or 9 or 10 or 11 or 12 or 13 or 14 or 15 or 16 or 17
		Exclude Non-English	.ab = abstract
		Can also exclude reviews if it helps	.kw = keyword
			.ti = title
			.tw = text word (abstract + title)
